# Supplementary material
Source: Springer Nature journal article supplement (https://www.springermedizin.de/resource/supplementary/12885_2011_3194_MOESM4_ESM.pdf/9462996)
Supplement: MOESM4 [file 9462996]

**A**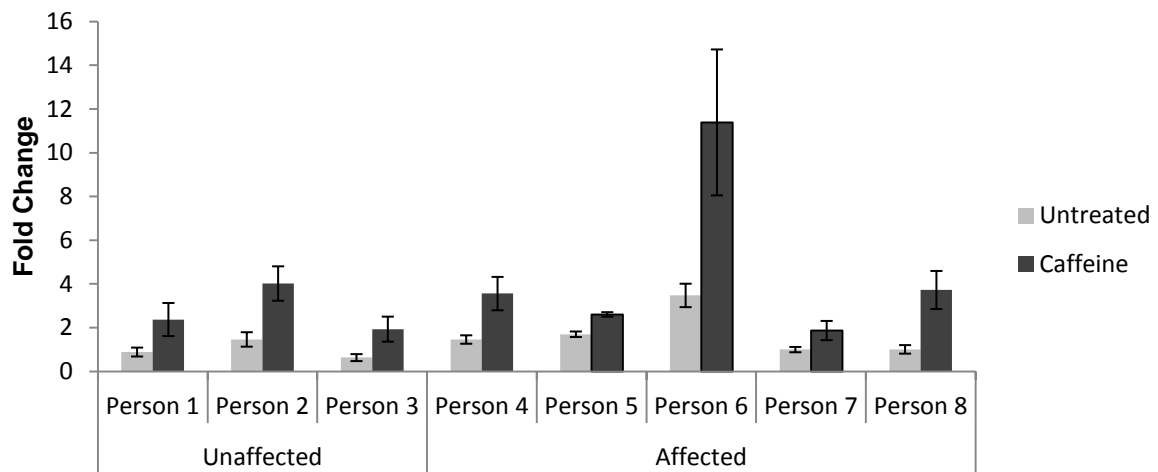**B**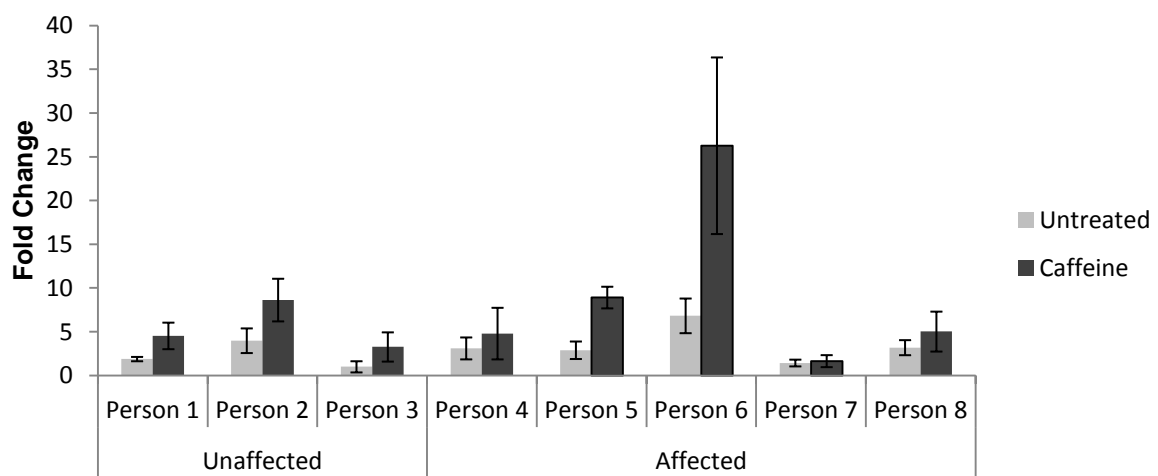**C**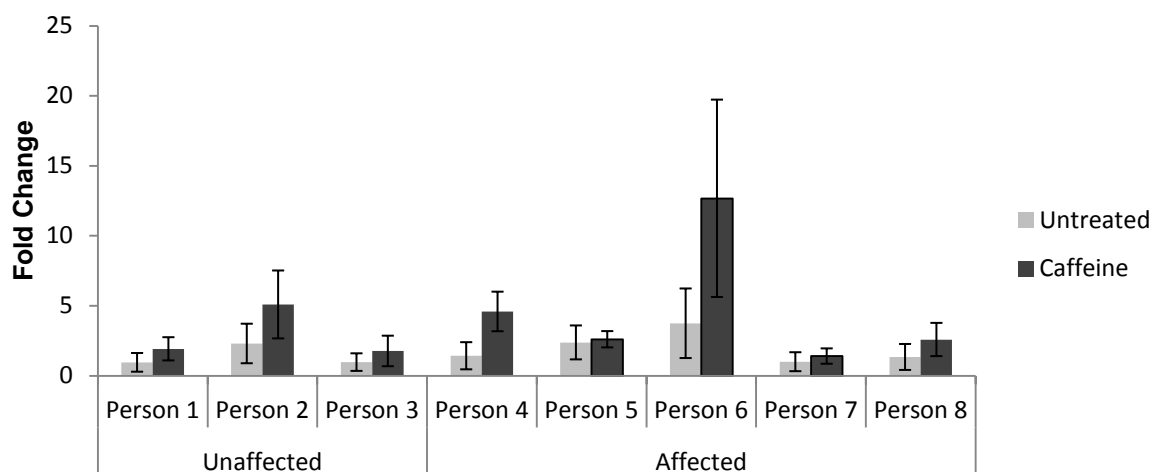

**Additional File 4: Stabilisation of *RAB3B* mRNA in the lymphoblastoid cell lines (LCLs) of individuals from Family A after caffeine (7.5mM) treatment measured by semi-quantitative real-time RT-PCR.** Each sample has been normalised to the housekeeping gene, *GAPDH*, and calibrated to the lowest expressing untreated sample to show variation in transcript expression across individuals. Standard error bars represent standard error from the mean of four technical replicates for each PCR reaction.
